# Supplementary material for: A novel overtone peak self-referencing fluorescent sensor based on a bipyridine-linked covalent organic framework for highly sensitive copper ion detection
Source: Royal Society of Chemistry journal article supplement (doi:10.1039/d4ay01738b), 2025-01-01
Supplement: d4ay01738b1.zip [file d4ay01738b1.zip]

**Supporting Information**

**A Novel Overtone Peak Self-Referencing Fluorescent Sensor Based on a Bipyridine-Linked Covalent Organic Framework for Highly Sensitive Copper Ion Detection**

Tongfu Huang a,Wei Xiong a,Fusheng Liao a,Guobing Wei a, Zhaojiang Yin a,Hao Fan ab,*

a Jiangxi University of Chinese Medicine, Nan Chang, Jiangxi 330004, China.

b Clinical Medical Research Center, Yichun People's Hospital, Yichun, Jiangxi 336000, China.

**
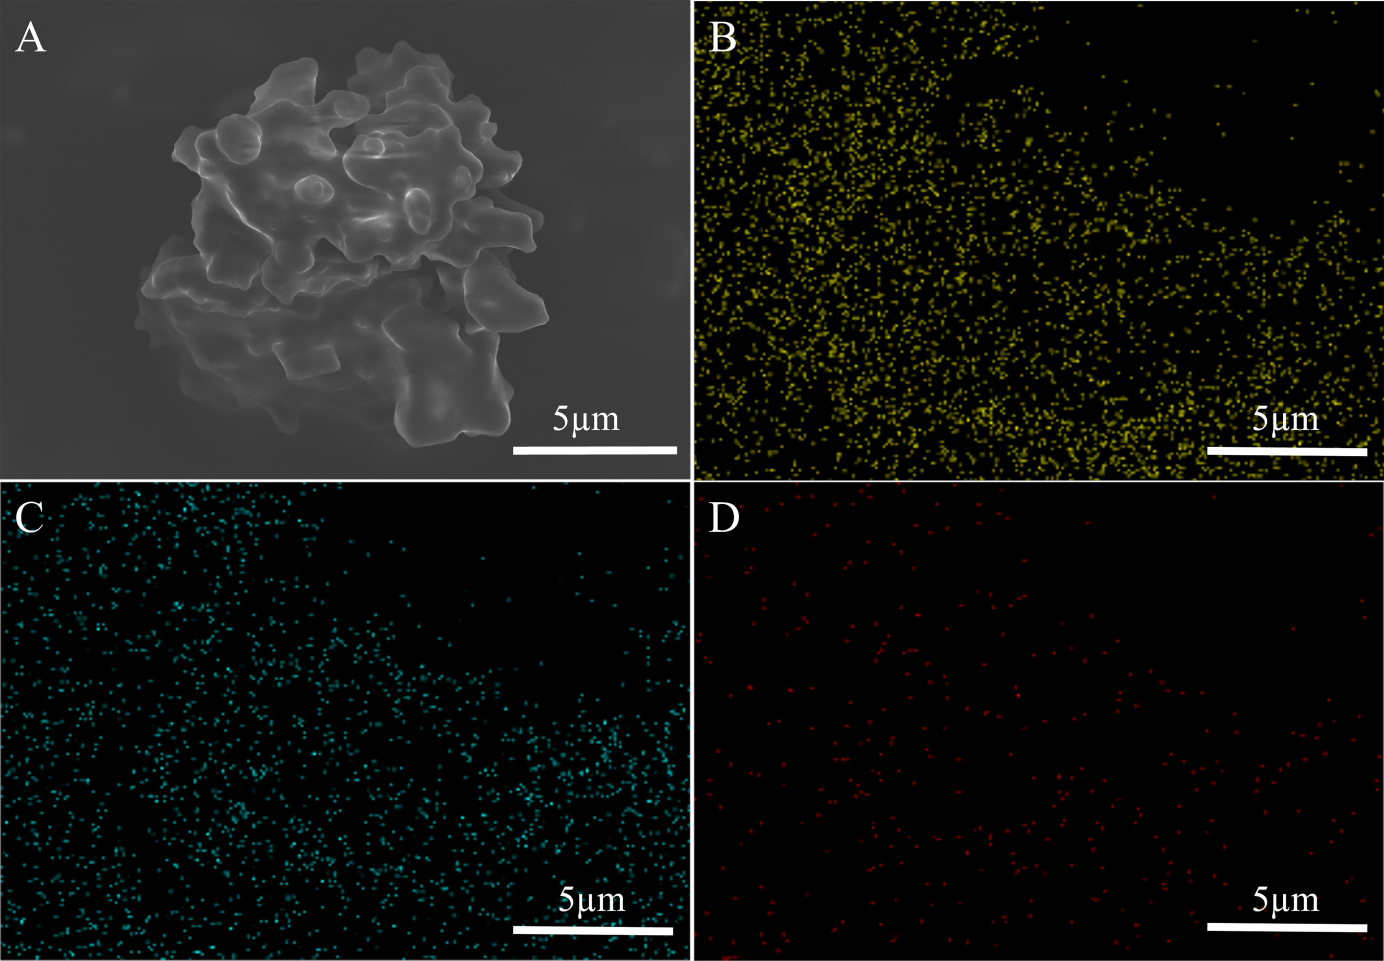
**

**Fig. S1.** (A) SEM image and EDS spectrometer of TPE-Bpy-COF. (B) C element, (C) N element, (D) O element.

**

Fig. S2.** Fluorescence change after Cu2+ treatment with Cu2+ with EDTA

| samples | τ1 | τ2 | B1 | B2 | τavg |
| --- | --- | --- | --- | --- | --- |
| TPE-Bpy-COF | 2.816×10−10 s | 2.850×10−9 s | -540.492 | -3432.618 | 2.89×10−9s |
| TPE-Bpy-COF@Cu2+ | 4.830×10−10 s | 3.636×10−9 s | 4096.767 | 116.313 | 1.04×10−9s |

**Table S1.** Fluorescence lifetime of TPE-Bpy-COF sensor in the absence of Cu2+ / presence of Cu2+. the average fluorescence lifetime (τavg) computational formula： .
